# Supplementary material for: Operating Policies in Robotic Compact Storage and Retrieval Systems
Source: Atypon-hosted journal article supplement (doi:10.1287/trsc.2017.0786), 2018-05-22
Supplement: trsc.2017.0786-sm.pdf [file trsc.2017.0786-sm.pdf]

## Appendix A: Service time expressions in the SOQN

The mean value of the movement time  $T_{d,r}$  (under both dedicated and shared storage policies) can be calculated by the following equation.

$$\bar{T}_{d,r} = \sum_{x_d=1}^W \sum_{y_d=1}^L \sum_{x_r=1}^W \sum_{y_r=1}^L \left[ \frac{|x_d - x_r| \cdot w + |y_d - y_r| \cdot l}{v_r} + g \cdot t_t \right] \cdot P(x_d)P(y_d)P(x_r)P(y_r)$$

We can obtain the mean values of both movement times  $T_{r,w_i}$  and  $T_{w_i,s}$  by the same logic. The resulting first two moments of service times of the service nodes in the SOQN are presented in Table 1

**Table 1 The first two moments of service times of service nodes in the SOQN**

| Service node    | Storage policy    | Mean value of service time                                                                                                                                                                                                                                                                                                             | scv of service time                                                                                             |
|-----------------|-------------------|----------------------------------------------------------------------------------------------------------------------------------------------------------------------------------------------------------------------------------------------------------------------------------------------------------------------------------------|-----------------------------------------------------------------------------------------------------------------|
| $\mu_{d,r}$     | random stacks     | $\frac{Ww+Ll}{3v_r} + \frac{(LW-W-L-3)t_t}{LW-1}$                                                                                                                                                                                                                                                                                      | $cv_{d,r}^2 = \frac{E[T_{d,r}^2] - \bar{T}_{d,r}^2}{\bar{T}_{d,r}^2}$                                           |
|                 | zoned stacks      | $\left[ \frac{P_A^2 w_A}{3} + P_B^2 \left( \frac{w_B}{3} + \frac{w_A}{2} \right) + P_C^2 \left( \frac{w_C}{3} + \frac{w_B}{2} + \frac{w_A}{2} \right) + 2P_A P_B (w_A + \frac{w_B}{2}) + 2P_A P_C (w_A + w_B + \frac{w_C}{2}) + P_B P_C (w_A + w_B + \frac{w_C}{2}) \right] \frac{w}{v_r} + \frac{Ll}{3} + \frac{(LW-W-L-3)t_t}{LW-1}$ |                                                                                                                 |
| $\mu_{r,w_i}$   | random stacks     | $\frac{Ww}{2v_r} + \frac{1}{L} \sum_{j=1}^L \frac{ j-yw_i l}{v_r} + \frac{t_t}{L}$                                                                                                                                                                                                                                                     | $cv_{r,w_i}^2 = \frac{E[T_{r,w_i}^2] - \bar{T}_{r,w_i}^2}{\bar{T}_{r,w_i}^2}$                                   |
|                 | zoned stacks      | $\frac{Ww}{2v_r} + \frac{1}{L} \sum_{j=1}^L \frac{ j-yw_i l}{v_r} + \frac{t_t}{L}$                                                                                                                                                                                                                                                     |                                                                                                                 |
| $\mu_{w_i,s}$   | random stacks     | $\frac{Ww}{2v_r} + \frac{1}{L} \sum_{j=1}^L \frac{ j-yw_i l}{v_r} + \frac{t_t}{L}$                                                                                                                                                                                                                                                     | $cv_{w_i,s}^2 = \frac{E[T_{w_i,s}^2] - \bar{T}_{w_i,s}^2}{\bar{T}_{w_i,s}^2}$                                   |
|                 | zoned, dedicated  | $\frac{Ww}{2v_r} + \frac{1}{L} \sum_{j=1}^L \frac{ j-yw_i l}{v_r} + \frac{t_t}{L}$                                                                                                                                                                                                                                                     |                                                                                                                 |
|                 | zoned, shared     | $\left[ P_A \left( \frac{w_A}{4} + \frac{w_B}{2} + \frac{w_C}{2} \right) + P_B \left( \frac{w_B}{4} + \frac{w_C}{2} \right) + \frac{P_C w_C}{4} \right] \frac{w}{v_r} + \sum_{j=1}^L \frac{ j-yw_i l}{v_r} + \frac{t_t}{L}$                                                                                                            |                                                                                                                 |
| $\mu_w$         | -                 | $\frac{1}{\frac{2Hh_b}{v_l} + 2t_{lu} + t_p - \frac{\lambda t_p^2}{n_w}}$                                                                                                                                                                                                                                                              | $\frac{(t_p - \frac{\lambda t_p^2}{n_w})^2}{[\frac{2Hh_b}{v_l} + 2t_{lu} + t_p - \frac{\lambda t_p^2}{n_w}]^2}$ |
| $\mu_{re1}$     | shared            | $\left[ \left( \frac{w\tau^2}{9v_r} - \frac{2h_b\tau^2}{9v_l} + \frac{h_b\tau}{2v_l} \right) H^2 + \left( \frac{w\tau}{6v_r} - \frac{h_b}{2v_l} + \frac{h_b\tau}{6v_l} \right) H + \frac{h_b}{6v_l} - \frac{w}{3v_r} \right] (1 + \gamma) + \frac{t_{lu}\tau H}{2} - \frac{t_{lu}}{2}$                                                 | $cv_{re1}^2 = \frac{E[T_{re1}^2] - \bar{T}_{re1}^2}{\bar{T}_{re1}^2}$                                           |
| $\mu_{re2}$     | shared            | $\left[ \left( \frac{w\tau^2}{9v_r} - \frac{2h_b\tau^2}{9v_l} + \frac{h_b\tau}{2v_l} \right) H^2 + \left( \frac{w\tau}{6v_r} - \frac{h_b}{2v_l} + \frac{2h_b\tau}{3v_l} \right) H + \frac{h_b}{6v_l} - \frac{w}{3v_r} \right] (1 + \gamma) + \frac{t_{lu}\tau H}{2} - \frac{t_{lu}}{2}$                                                | $cv_{re2}^2 = \frac{E[T_{re2}^2] - \bar{T}_{re2}^2}{\bar{T}_{re2}^2}$                                           |
| $\mu_{lu}^D$    | dedicated         | $\sum_{i=1}^N \frac{p_i}{I_i} \sum_{h=1}^{I_i} \frac{2(H-h)h_b}{v_l} + t_{lu}$                                                                                                                                                                                                                                                         | $cv_{lu}^2 = \frac{E[T_{lu}^2] - \bar{T}_{lu}^2}{\bar{T}_{lu}^2}$                                               |
| $\mu_{lu}^S$    | shared            | $\left[ \frac{(2-\tau)h_b H}{v_l} - \frac{h_b}{v_l} \right] (1 + \gamma) + t_{lu}$                                                                                                                                                                                                                                                     |                                                                                                                 |
| $\mu_{lu}^{SI}$ | shared, immediate | $\left[ \frac{(2-\tau)h_b H}{v_l} - \frac{h_b}{v_l} \right] (1 + \gamma) + 3t_{lu} + \frac{3l}{v_r}$                                                                                                                                                                                                                                   |                                                                                                                 |
| $\mu_{lu}^{SD}$ | shared, delayed   | $\left[ \frac{(2-\tau)h_b H}{v_l} - \frac{h_b}{v_l} \right] (1 + \gamma) + t_{lu}$                                                                                                                                                                                                                                                     |                                                                                                                 |

Notes: The parameter  $\gamma$  models the honeycombing effect, which allows inflating the travel time in the storage stack.



Based on above equation, we can obtain  $\mathbf{R}$  by the following iterative method (Cai, Heragu, and Liu (2014), Tappia et al. (2017))

---

```

 $\mathbf{R}_0 = \mathbf{0}, \mathbf{R}_1 = -(\mathbf{A} + \mathbf{R}_0^2 \mathbf{C})\mathbf{B}^{-1}, k = 0$ 
while  $\|\mathbf{R}_{k+1} - \mathbf{R}_k\| > \varepsilon$ 
   $k++$ ;
   $\mathbf{R}_{k+1} = -(\mathbf{A} + \mathbf{R}_k^2 \mathbf{C})\mathbf{B}^{-1}$ ;
end
 $\mathbf{R} = \mathbf{R}_k$ 

```

---

### Appendix C: Proof of optimal width to length ratio in the case of random storage stacks

The objective of optimizing the width to length ratio (in traveling time) is to minimize the expected movement time of robots on the grid in a dual command cycle, i.e.,  $T = \bar{T}_{d,r} + \bar{T}_{r,w} + \bar{T}_{w,s}$ . In the case of random storage stacks, both storage and retrieval positions could be in any cell with the same probability. Moreover, any workstation will be equally likely assigned to the robot. So, we can write  $T$  as Eq.(C.1)

$$T = \frac{1}{v_r} \left[ \frac{W \cdot w}{3} + \frac{L \cdot l}{3} + 2 \left( \frac{W \cdot w}{2} + \frac{1}{n} \sum_{i=1}^n \frac{1}{L} \sum_{j=1}^L |j - y_{w_i}| \cdot l \right) \right], \quad (\text{C.1})$$

where  $n = \frac{n_w}{2}$ ,  $y_{w_i}$  is the y-axis coordinate of the  $i$ th workstation and  $y_{w_i} = \frac{iL}{n+1}$ .

After some simplification, we get

$$T = \frac{1}{v_r} \left[ \frac{4Ww}{3} + \frac{(3n+2)Ll}{3n+3} \right] \geq \frac{2}{v_r} \sqrt{\frac{4Ww}{3} \cdot \frac{(3n+2)Ll}{3n+3}} = \frac{2}{v_r} \sqrt{\frac{4(3n_w+2)wl \frac{C}{H}}{3(3n+3)}}.$$

Therefore,  $T$  takes the minimum value when  $\frac{4Ww}{3} = \frac{(3n+2)Ll}{3n+3}$ . So, the optimal width to length ratio (in traveling time) is  $r_t^* = \frac{W \cdot w}{L \cdot l} = \frac{(3n_w+4)}{(4n_w+8)}$ . In a RCSRS with 4 workstations,  $r_t^* = \frac{2}{3}$  and  $r^* = \frac{1}{2}$ .

### Appendix D: SOQN for multiple-line order

After the completion of a retrieval transaction, the robot goes back to  $Q_R$  with probability  $p$ , while it continues picking up another item with probability  $1-p$ . For orders with  $N_O$  items,  $p = \frac{1}{N_O}$  (Lamballais, Roy, and De Koster (2017)).

### Appendix E: Simulation model

The simulation model contains the following processes (see Fig.2 for a flow diagram):

1. The orders arrive at the system, following a Poisson process with mean arrival rate  $\lambda$  per hour.
2. The system randomly assigns a robot to the order. If all robots are busy, the order waits in the order queue.
3. The assigned robot moves from its dwell point to the retrieval point according to a shortest path. In the case of random storage stacks, both the robot dwell point and the retrieval point are uniformly distributed over the stacks. In the case of zoned storage stacks, they are in each zone with a probability proportional to the percentage of products turnover in that zone.

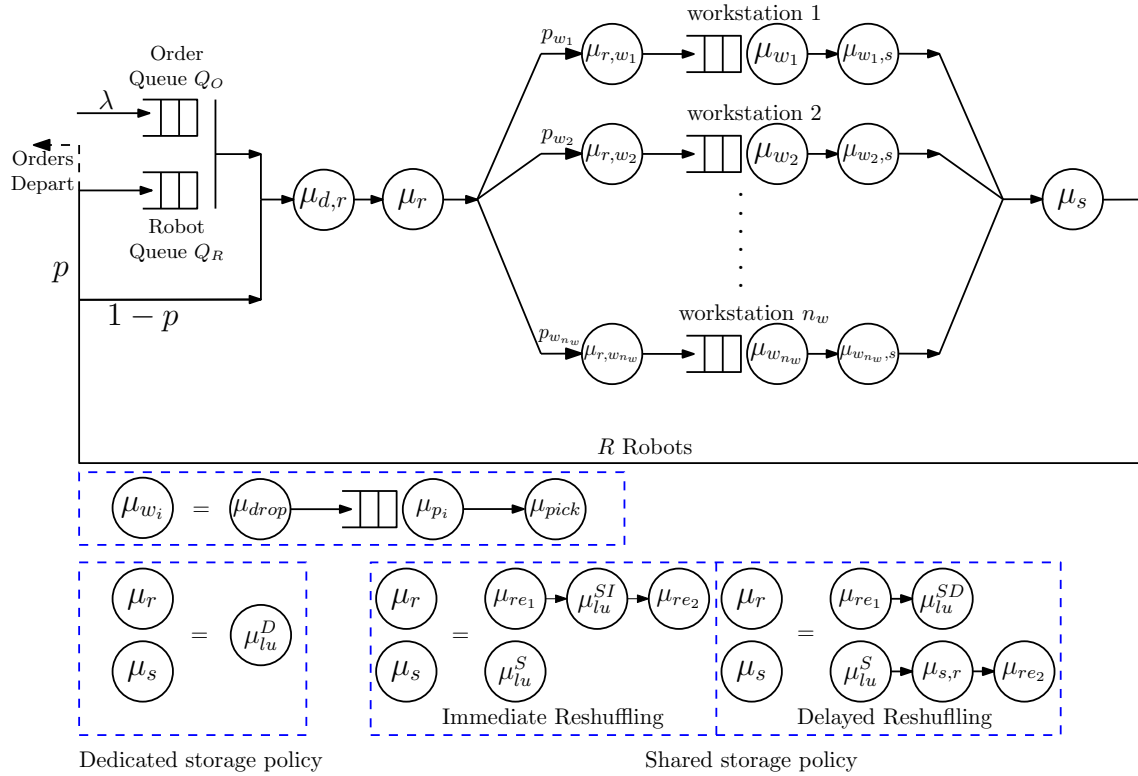

**Figure 1** SOQN for multiple-line order in robotic-compact storage and retrieval system

4. The robot fetches the retrieval bin, which may include reshuffling of blocking bins. Under the dedicated storage policy, the robot directly picks up the top bin. Under the shared storage policy, the system will first identify whether the retrieval bin is on the top of the storage stack. If not, the robot will first reshuffle the blocking bins on the grid and then fetch the retrieval bin. The blocking bins will be returned following the original stack sequence. If immediate reshuffling is used, the robot will put the retrieval bin on the grid temporarily, and then return the blocking bins into the stack. If delayed reshuffling is used, returning of the blocking bins will be done afterwards.

5. The robot transports the retrieval bin to the designated workstation according to a shortest path. There, the robot drops off the retrieval bin and picks up a storage bin.

6. The robot transports the storage bin to the storage point. In the case of random stacks, the stack that will hold the storage bin will be located equally likely at any position. In the case of zoned stacks, the probability that the robot will go to one zone is determined by the turnover of products in it.

7. The robot drops off the bin on the top of the storage stack.

8. If the previous retrieval operation includes reshuffling of blocking bins and the delayed reshuffling rule is used, the robot will move back to the retrieval point and returns the blocking bins into the storage stack.

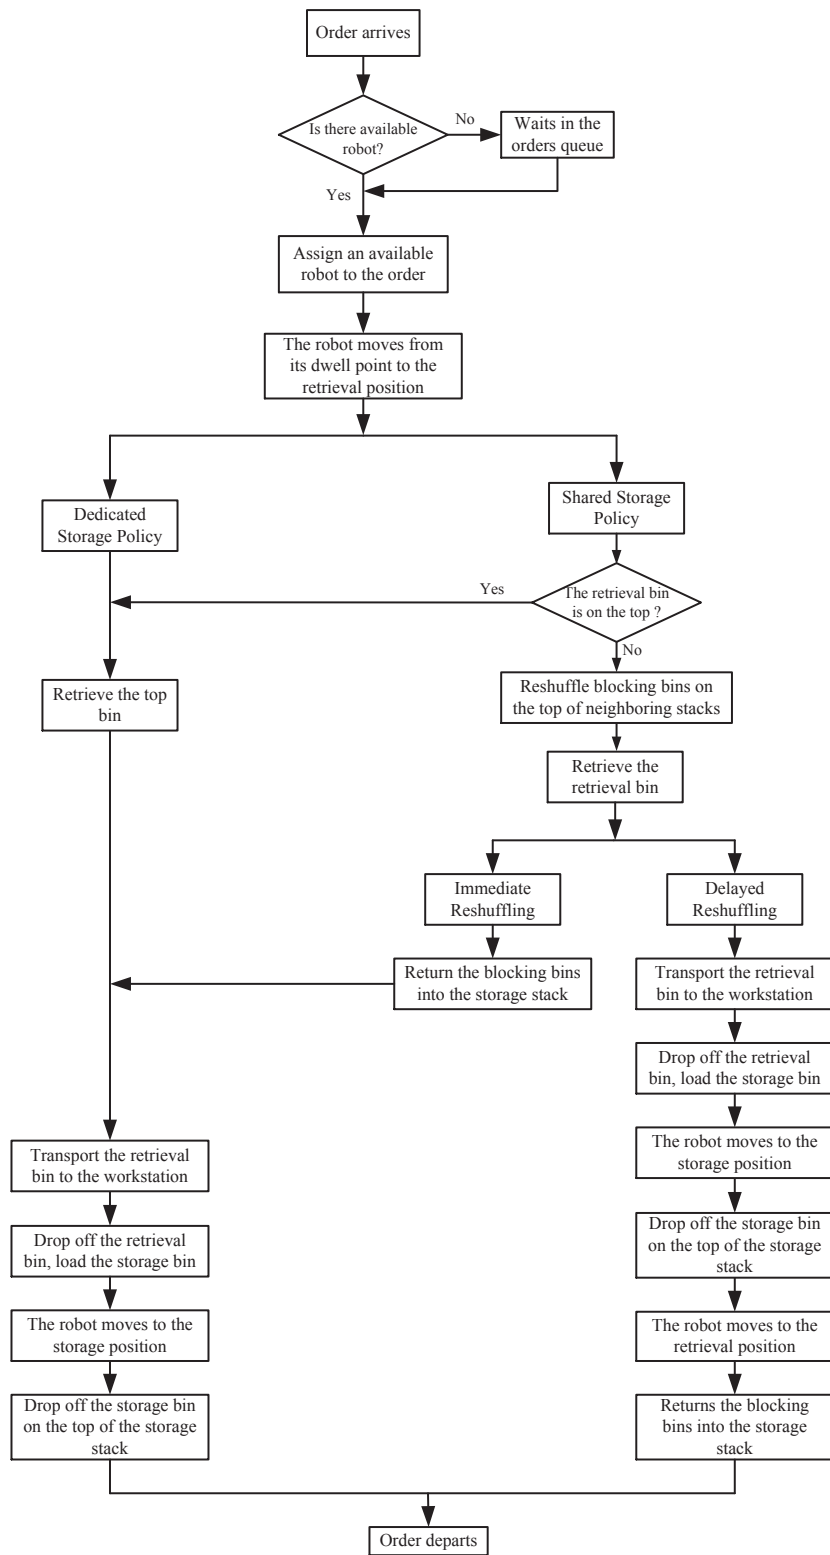

Figure 2 Flowchart of simulation models

## Appendix F: Simulation validation results

Table 2 Average analytical and simulation results of system scenarios with  $r = 1$  or 1.5

| SP  | Zoning | Resh | $R$       | $H, W, L$  | $\lambda$  | $THT_{DC}^A$ | $THT_{DC}^S$ | $W_w^A$ | $W_w^S$ | $W_R^A$ | $W_R^S$ | $\rho_R^A$ | $\rho_R^S$ | $\rho_D^A$ | $\rho_D^S$ | $FD^A$ | $FD^S$ |       |
|-----|--------|------|-----------|------------|------------|--------------|--------------|---------|---------|---------|---------|------------|------------|------------|------------|--------|--------|-------|
| Ded | Rand   | -    | 25        | 10,134,134 | 750        | 93.85        | 96.45        | 0.96    | 1.19    | 1.95    | 1.92    | 76.59      | 73.72      | 61.11      | 61.14      | 84.57  | 85.63  |       |
|     |        | -    | 25        | 10,134,134 | 850        | 103.83       | 104.01       | 2.02    | 2.07    | 10.86   | 10.35   | 87.80      | 85.66      | 73.36      | 73.39      | 84.57  | 85.42  |       |
|     |        | -    | 25        | 10,134,134 | 900        | 125.19       | 119.05       | 3.16    | 2.73    | 31.55   | 33.13   | 93.55      | 92.21      | 79.84      | 79.86      | 84.57  | 85.42  |       |
|     |        | -    | 25        | 15,113,113 | 750        | 86.97        | 88.74        | 1.83    | 2.11    | 0.90    | 0.84    | 71.72      | 68.16      | 71.85      | 71.87      | 79.28  | 80.07  |       |
|     |        | -    | 25        | 15,113,113 | 850        | 92.28        | 96.72        | 5.06    | 4.75    | 4.84    | 4.54    | 82.58      | 81.20      | 85.53      | 85.45      | 79.28  | 79.68  |       |
|     |        | -    | 25        | 15,113,113 | 900        | 99.85        | 105.47       | 11.84   | 11.77   | 11.63   | 12.92   | 88.22      | 89.73      | 92.73      | 92.68      | 79.28  | 78.69  |       |
|     |        | -    | 25        | 10,164,109 | 650        | 97.91        | 100.54       | 0.49    | 0.59    | 0.73    | 0.64    | 70.18      | 66.91      | 49.83      | 49.74      | 84.95  | 84.31  |       |
|     |        | -    | 25        | 10,164,109 | 750        | 102.61       | 104.36       | 0.96    | 1.10    | 4.50    | 4.42    | 81.76      | 78.92      | 61.11      | 61.19      | 84.95  | 86.01  |       |
|     |        | -    | 25        | 10,164,109 | 850        | 133.07       | 125.89       | 2.02    | 2.10    | 33.92   | 34.18   | 93.64      | 91.45      | 73.36      | 73.20      | 84.95  | 84.31  |       |
|     |        | -    | 25        | 15,140,93  | 750        | 94.16        | 95.67        | 1.83    | 2.22    | 2.07    | 1.90    | 76.74      | 73.11      | 71.85      | 71.87      | 77.75  | 76.97  |       |
|     |        | -    | 25        | 15,140,93  | 850        | 105.45       | 106.80       | 5.06    | 4.44    | 12.03   | 11.70   | 88.23      | 86.63      | 85.53      | 85.59      | 77.75  | 78.72  |       |
|     |        | -    | 25        | 15,140,93  | 900        | 131.72       | 140.59       | 11.84   | 10.93   | 37.56   | 40.20   | 94.16      | 94.87      | 92.73      | 92.79      | 77.75  | 78.33  |       |
|     | Zoned  | Rand | -         | 25         | 10,134,134 | 750          | 89.55        | 86.35   | 0.96    | 1.00    | 1.20    | 1.26       | 73.62      | 71.34      | 61.11      | 61.08  | 84.57  | 84.15 |
|     |        |      | -         | 25         | 10,134,134 | 850          | 95.75        | 91.58   | 2.02    | 1.72    | 6.33    | 6.53       | 84.46      | 82.91      | 73.36      | 73.40  | 84.57  | 84.78 |
|     |        |      | -         | 25         | 10,134,134 | 900          | 105.59       | 99.19   | 3.16    | 2.77    | 15.57   | 14.08      | 90.02      | 89.08      | 79.84      | 79.80  | 84.57  | 83.94 |
|     |        |      | -         | 25         | 15,113,113 | 750          | 83.55        | 80.17   | 1.83    | 1.86    | 0.58    | 0.51       | 69.14      | 66.57      | 71.85      | 71.90  | 79.28  | 80.27 |
|     |        |      | -         | 25         | 15,113,113 | 850          | 87.49        | 87.24   | 5.06    | 4.65    | 3.12    | 3.00       | 75.68      | 79.39      | 85.53      | 85.35  | 79.28  | 78.69 |
|     |        |      | -         | 25         | 15,113,113 | 900          | 92.34        | 98.38   | 10.39   | 11.20   | 7.17    | 6.51       | 85.17      | 88.44      | 92.73      | 92.77  | 79.28  | 78.29 |
|     |        |      | -         | 25         | 10,164,109 | 750          | 96.30        | 91.38   | 0.96    | 1.08    | 2.55    | 2.60       | 78.13      | 75.23      | 61.11      | 61.24  | 84.95  | 84.74 |
|     |        |      | -         | 25         | 10,164,109 | 850          | 109.85       | 103.78  | 2.02    | 1.80    | 15.03   | 15.10      | 89.55      | 87.10      | 73.36      | 73.35  | 84.95  | 85.80 |
|     |        |      | -         | 25         | 10,164,109 | 900          | 147.19       | 135.70  | 3.16    | 2.71    | 51.79   | 50.86      | 95.39      | 93.42      | 79.84      | 79.71  | 84.95  | 84.31 |
|     |        |      | -         | 25         | 15,140,93  | 750          | 89.49        | 84.84   | 3.95    | 3.82    | 1.24    | 1.30       | 73.55      | 70.22      | 71.85      | 71.92  | 77.75  | 77.94 |
|     |        |      | -         | 25         | 15,140,93  | 850          | 96.40        | 93.09   | 5.06    | 4.42    | 6.78    | 6.37       | 84.64      | 83.34      | 85.53      | 85.59  | 77.75  | 78.53 |
|     |        |      | -         | 25         | 15,140,93  | 900          | 107.69       | 109.05  | 11.84   | 10.82   | 17.31   | 17.77      | 90.39      | 91.28      | 92.73      | 92.72  | 77.75  | 78.14 |
| Sha |        | Imm  | -         | 30         | 10,94,94   | 800          | 101.77       | 102.60  | 1.37    | 1.39    | 1.00    | 0.98       | 74.64      | 75.45      | 67.11      | 67.27  | 98.05  | 97.31 |
|     |        |      | -         | 30         | 10,94,94   | 900          | 107.49       | 110.27  | 3.16    | 2.73    | 5.52    | 6.06       | 84.97      | 86.91      | 79.84      | 79.09  | 98.05  | 96.82 |
|     |        |      | -         | 30         | 10,94,94   | 950          | 116.42       | 125.00  | 5.58    | 5.99    | 13.78   | 14.69      | 90.28      | 93.19      | 86.57      | 86.60  | 98.05  | 96.82 |
|     |        |      | -         | 30         | 15,76,76   | 650          | 122.15       | 121.82  | 0.86    | 0.91    | 0.89    | 0.75       | 72.98      | 72.85      | 59.14      | 59.12  | 99.97  | 99.72 |
|     |        |      | -         | 30         | 15,76,76   | 750          | 128.99       | 128.49  | 1.83    | 1.57    | 6.62    | 6.42       | 84.98      | 85.48      | 71.85      | 71.81  | 99.97  | 99.72 |
|     |        |      | -         | 30         | 15,76,76   | 800          | 142.26       | 146.13  | 2.88    | 2.61    | 19.26   | 21.03      | 91.11      | 92.87      | 78.57      | 80.58  | 99.97  | 99.97 |
|     |        |      | -         | 30         | 10,114,76  | 750          | 104.82       | 105.45  | 0.96    | 1.12    | 0.68    | 0.65       | 72.32      | 72.67      | 61.11      | 61.10  | 99.97  | 99.97 |
|     |        |      | -         | 30         | 10,114,76  | 850          | 109.24       | 111.34  | 2.02    | 1.90    | 4.00    | 4.22       | 82.83      | 84.29      | 73.36      | 73.34  | 99.97  | 99.72 |
|     |        |      | -         | 30         | 10,114,76  | 920          | 120.52       | 129.56  | 3.89    | 3.54    | 14.41   | 16.61      | 90.39      | 93.18      | 82.51      | 83.65  | 99.97  | 99.97 |
|     |        |      | -         | 30         | 15,95,63   | 650          | 127.16       | 127.06  | 0.86    | 0.99    | 1.22    | 1.46       | 75.65      | 75.66      | 59.14      | 59.08  | 96.50  | 96.26 |
|     |        |      | -         | 30         | 15,95,63   | 750          | 138.16       | 137.70  | 1.83    | 1.69    | 11.35   | 10.81      | 88.06      | 88.94      | 71.85      | 71.96  | 96.50  | 95.54 |
|     |        |      | -         | 30         | 15,95,63   | 800          | 167.72       | 170.65  | 2.88    | 2.36    | 40.30   | 41.53      | 94.38      | 95.67      | 78.57      | 78.59  | 96.50  | 95.29 |
|     | Rand   | -    | 30        | 10,94,94   | 700        | 113.20       | 117.07       | 0.69    | 0.77    | 0.79    | 0.82    | 72.86      | 75.05      | 55.35      | 55.24      | 98.05  | 96.82  |       |
|     |        | -    | 30        | 10,94,94   | 800        | 118.56       | 125.22       | 1.37    | 1.36    | 5.14    | 5.62    | 84.01      | 87.09      | 67.11      | 66.91      | 98.05  | 98.30  |       |
|     |        | -    | 30        | 10,94,94   | 880        | 141.05       | 144.02       | 2.62    | 2.10    | 26.73   | 28.29   | 93.15      | 94.28      | 77.22      | 77.20      | 98.05  | 99.03  |       |
|     |        | -    | 30        | 15,76,76   | 650        | 133.71       | 132.00       | 0.86    | 0.93    | 2.63    | 2.73    | 78.89      | 78.42      | 59.14      | 59.25      | 99.97  | 98.97  |       |
|     |        | -    | 30        | 15,76,76   | 700        | 139.08       | 136.28       | 1.23    | 1.22    | 7.48    | 7.38    | 85.30      | 84.85      | 65.38      | 65.33      | 99.97  | 99.22  |       |
|     |        | -    | 30        | 15,76,76   | 750        | 155.81       | 148.23       | 1.83    | 1.58    | 23.65   | 22.67   | 91.78      | 91.63      | 71.85      | 71.80      | 99.97  | 99.97  |       |
|     |        | -    | 30        | 10,114,76  | 700        | 118.26       | 117.88       | 0.69    | 0.86    | 1.36    | 1.18    | 75.77      | 75.67      | 55.35      | 55.37      | 99.97  | 98.64  |       |
|     |        | -    | 30        | 10,114,76  | 750        | 120.92       | 120.57       | 0.95    | 1.14    | 3.53    | 3.01    | 81.52      | 81.65      | 61.11      | 61.12      | 99.97  | 98.19  |       |
|     |        | -    | 30        | 10,114,76  | 850        | 146.41       | 148.18       | 2.02    | 1.97    | 27.97   | 28.25   | 93.22      | 94.31      | 73.36      | 73.29      | 99.97  | 98.22  |       |
|     |        | -    | 30        | 15,95,63   | 650        | 140.88       | 139.07       | 0.86    | 1.02    | 4.55    | 4.43    | 82.06      | 81.74      | 59.14      | 59.20      | 96.50  | 96.26  |       |
|     |        | -    | 30        | 15,95,63   | 700        | 150.57       | 146.31       | 1.23    | 1.33    | 13.71   | 14.58   | 88.71      | 88.44      | 65.38      | 65.31      | 96.50  | 96.26  |       |
|     |        | -    | 30        | 15,95,63   | 730        | 166.85       | 160.86       | 1.56    | 1.63    | 29.66   | 28.00   | 92.73      | 93.07      | 69.23      | 70.02      | 96.50  | 95.78  |       |
| Imm | -      | 25   | 10,95,95  | 700        | 94.83      | 90.65        | 0.69         | 0.67    | 1.08    | 1.08    | 72.92   | 70.05      | 55.35      | 55.32      | 99.87      | 98.62  |        |       |
|     | -      | 25   | 10,95,95  | 800        | 100.81     | 95.05        | 1.37         | 1.16    | 6.07    | 6.48    | 84.22   | 81.64      | 67.11      | 67.14      | 99.87      | 98.37  |        |       |
|     | -      | 25   | 10,95,95  | 900        | 151.53     | 146.59       | 3.16         | 3.60    | 55.67   | 52.56   | 95.86   | 93.66      | 79.84      | 79.77      | 99.87      | 99.62  |        |       |
|     | -      | 25   | 15,78,78  | 600        | 119.27     | 113.94       | 0.60         | 0.57    | 2.82    | 2.84    | 77.64   | 75.06      | 53.14      | 53.18      | 98.77      | 99.26  |        |       |
|     | -      | 25   | 15,78,78  | 650        | 124.77     | 116.92       | 0.86         | 0.76    | 7.84    | 7.38    | 84.45   | 81.88      | 59.14      | 59.21      | 98.77      | 98.03  |        |       |
|     | -      | 25   | 15,78,78  | 700        | 141.83     | 135.25       | 1.23         | 0.99    | 24.38   | 22.44   | 91.35   | 88.78      | 65.38      | 65.44      | 98.77      | 98.52  |        |       |
|     | -      | 25   | 10,117,78 | 700        | 98.71      | 93.76        | 0.69         | 0.75    | 1.67    | 1.66    | 75.48   | 72.28      | 55.35      | 55.35      | 98.77      | 98.03  |        |       |
|     | -      | 25   | 10,117,78 | 800        | 107.81     | 99.25        | 1.37         | 1.23    | 9.78    | 9.26    | 87.14   | 84.08      | 67.11      | 67.09      | 98.77      | 97.54  |        |       |
|     | -      | 25   | 10,117,78 | 850        | 126.99     | 116.70       | 2.02         | 2.04    | 28.42   | 25.62   | 93.09   | 90.07      | 73.36      | 73.21      | 98.77      | 99.76  |        |       |
|     | -      | 25   | 15,96,64  | 600        | 122.89     | 116.67       | 0.60         | 0.62    | 3.75    | 3.72    | 79.42   | 76.64      | 51.67      | 53.21      | 97.80      | 97.31  |        |       |
|     | -      | 25   | 15,96,64  | 650        | 130.35     | 123.48       | 0.86         | 0.82    | 10.73   | 9.90    | 86.39   | 83.39      | 59.14      | 59.11      | 97.80      | 97.31  |        |       |
|     | -      | 25   | 15,96,64  | 700        | 157.91     | 148.11       | 1.23         | 1.06    | 37.78   | 33.05   | 93.43   | 90.59      | 65.38      | 65.32      | 97.80      | 98.78  |        |       |
|     | Zoned  | -    | 25        | 10,95,95   | 650        | 105.58       | 101.03       | 0.49    | 0.49    | 1.66    | 1.82    | 75.05      | 72.30      | 49.83      | 49.82      | 99.87  | 99.87  |       |
|     |        | -    | 25        | 10,95,95   | 750        | 115.65       | 106.82       | 0.96    | 0.86    | 10.82   | 10.48   | 87.36      | 84.48      | 61.11      | 60.98      | 99.87  | 98.87  |       |
|     |        | -    | 25        | 10,95,95   | 800        | 139.45       | 128.41       | 1.37    | 1.14    | 34.12   | 31.84   | 93.63      | 91.21      | 67.11      | 67.20      | 99.87  | 99.12  |       |
|     |        | -    | 25        | 15,78,78   | 580        | 129.09       | 123.12       | 0.52    | 0.52    | 4.50    | 4.68    | 80.29      | 77.87      | 50.81      | 50.83      | 98.77  | 98.52  |       |
|     |        | -    | 25        | 15,78,78   | 630        | 138.64       | 127.96       | 0.74    | 0.68    | 13.58   | 13.04   | 87.54      | 85.03      | 56.71      | 56.72      | 98.77  | 99.26  |       |
|     |        | -    | 25        | 15,78,78   | 680        | 181.71       | 168.95       | 1.06    | 0.90    | 56.16   | 51.93   | 94.86      | 92.17      | 62.85      | 62.76      | 98.77  | 99.51  |       |
|     |        | -    | 25        | 10,117,78  | 650        | 110.07       | 104.72       | 0.49    | 0.54    | 2.55    | 2.62    | 77.65      | 74.76      | 49.83      | 49.88      | 98.77  | 97.54  |       |
|     |        | -    | 25        | 10,117,78  | 750        | 126.82       | 118.11       | 0.96    | 0.93    | 18.38   | 16.54   | 90.36      | 87.29      | 61.11      | 61.05      | 98.77  | 98.77  |       |
|     |        | -    | 25        | 10,117,78  | 800        | 195.59       | 183.28       | 1.37    | 1.21    | 86.66   | 79.40   | 96.82      | 93.97      | 67.11      | 67.11      | 98.77  | 99.02  |       |
|     |        | -    | 25        | 15,96,64   | 550        | 130.39       | 124.71       | 0.43    | 0.47    | 3.13    | 3.40    | 77.77      | 75.29      | 47.39      | 47.46      | 97.80  | 96.82  |       |
|     |        | -    | 25        | 15,96,64   | 600        | 137.19       | 128.00       | 0.60    | 0.62    | 9.49    | 8.82    | 85.14      | 82.27      | 53.14      | 53.06      | 97.80  | 97.56  |       |
|     |        | -    | 25        | 15,96,64   | 650        | 162.01       | 159.00       | 0.86    | 0.83    | 33.83   | 32.03   | 92.57      | 90.02      | 59.14      | 59.23      | 97.80  | 98.78  |       |

**Appendix G: Optimal system scenarios to minimize the total system cost**

**Table 3 The optimal system scenarios to minimize the total costs**

|         |       | $THT_{DCmax}$ |       |         |     |     |     |     |     |     |     |     |     |     |     |     |     |     |     |     |     |
|---------|-------|---------------|-------|---------|-----|-----|-----|-----|-----|-----|-----|-----|-----|-----|-----|-----|-----|-----|-----|-----|-----|
| SP      | $s$   | 90            | 100   | 110     | 120 | 130 | 140 | 150 | 160 | 170 | 180 | 190 | 200 | 210 | 220 | 230 | 240 | 250 |     |     |     |
| SP      | 0.065 | $W^*$         | 112   | 112     | 112 | 112 | 112 | 112 | 112 | 112 | 112 | 112 | 112 | 112 | 112 | 112 | 112 | 112 | 112 |     |     |
|         |       | $L^*$         | 140   | 140     | 140 | 140 | 140 | 140 | 140 | 140 | 140 | 140 | 140 | 140 | 140 | 140 | 140 | 140 | 140 | 140 |     |
|         |       | $H^*$         | 16    | 16      | 16  | 16  | 16  | 16  | 16  | 16  | 16  | 16  | 16  | 16  | 16  | 16  | 16  | 16  | 16  | 16  | 16  |
|         |       | $R^*$         | 13    | 10      | 10  | 9   | 9   | 9   | 9   | 9   | 9   | 9   | 8   | 8   | 8   | 8   | 8   | 8   | 8   | 8   | 8   |
|         |       | $P_A^*$       | 0.2   | 0.1     | 0.1 | 0.1 | 0.1 | 0.1 | 0.1 | 0.1 | 0.1 | 0.1 | 0.1 | 0.1 | 0.1 | 0.1 | 0.1 | 0.1 | 0.1 | 0.1 | 0.1 |
|         |       | $P_B^*$       | 0.7   | 0.6     | 0.1 | 0.4 | 0.1 | 0.1 | 0.1 | 0.1 | 0.1 | 0.1 | 0.1 | 0.8 | 0.7 | 0.6 | 0.6 | 0.5 | 0.4 | 0.4 | 0.4 |
|         |       | $P_C^*$       | 0.1   | 0.3     | 0.8 | 0.5 | 0.8 | 0.8 | 0.8 | 0.8 | 0.8 | 0.8 | 0.1 | 0.2 | 0.3 | 0.3 | 0.4 | 0.5 | 0.5 | 0.5 | 0.5 |
|         |       | $W^*$         | NaN   | 153     | 140 | 140 | 140 | 140 | 140 | 140 | 140 | 140 | 140 | 140 | 140 | 140 | 140 | 140 | 140 | 140 | 140 |
|         |       | $L^*$         | NaN   | 153     | 200 | 200 | 200 | 200 | 200 | 200 | 200 | 200 | 200 | 200 | 200 | 200 | 200 | 200 | 200 | 200 | 200 |
|         |       | $H^*$         | NaN   | 18      | 13  | 13  | 13  | 13  | 13  | 13  | 13  | 13  | 13  | 13  | 13  | 13  | 13  | 13  | 13  | 13  | 13  |
|         |       | $R^*$         | NaN   | 9       | 14  | 12  | 11  | 11  | 11  | 10  | 10  | 10  | 10  | 10  | 10  | 10  | 10  | 10  | 10  | 10  | 10  |
|         |       | Ded           | 0.222 | $P_A^*$ | NaN | 0.2 | 0.1 | 0.1 | 0.1 | 0.1 | 0.1 | 0.4 | 0.1 | 0.1 | 0.1 | 0.1 | 0.1 | 0.1 | 0.1 | 0.1 | 0.1 |
| $P_B^*$ | NaN   |               |       | 0.6     | 0.5 | 0.1 | 0.3 | 0.1 | 0.1 | 0.5 | 0.5 | 0.2 | 0.1 | 0.1 | 0.1 | 0.1 | 0.1 | 0.1 | 0.1 | 0.1 |     |
| $P_C^*$ | NaN   |               |       | 0.2     | 0.4 | 0.8 | 0.6 | 0.8 | 0.8 | 0.1 | 0.4 | 0.7 | 0.8 | 0.8 | 0.8 | 0.8 | 0.8 | 0.8 | 0.8 | 0.8 |     |
| $W^*$   | NaN   |               |       | NaN     | 121 | 155 | 155 | 155 | 155 | 155 | 155 | 155 | 155 | 155 | 155 | 155 | 155 | 155 | 155 | 155 |     |
| $L^*$   | NaN   |               |       | NaN     | 200 | 155 | 155 | 155 | 155 | 155 | 155 | 155 | 155 | 155 | 155 | 155 | 155 | 155 | 155 | 155 |     |
| $H^*$   | NaN   |               |       | NaN     | 19  | 19  | 19  | 19  | 19  | 19  | 19  | 19  | 19  | 19  | 19  | 19  | 19  | 19  | 19  | 19  |     |
| $R^*$   | NaN   |               |       | NaN     | 16  | 13  | 12  | 12  | 11  | 11  | 11  | 11  | 11  | 11  | 11  | 11  | 11  | 11  | 10  | 10  |     |
| $P_A^*$ | NaN   |               |       | NaN     | 0.1 | 0.1 | 0.1 | 0.1 | 0.1 | 0.1 | 0.1 | 0.1 | 0.1 | 0.1 | 0.1 | 0.1 | 0.1 | 0.1 | 0.1 | 0.1 |     |
| $P_B^*$ | NaN   |               |       | NaN     | 0.3 | 0.1 | 0.1 | 0.1 | 0.1 | 0.1 | 0.1 | 0.1 | 0.1 | 0.1 | 0.1 | 0.1 | 0.1 | 0.1 | 0.4 | 0.2 |     |
| $P_C^*$ | NaN   |               |       | NaN     | 0.6 | 0.8 | 0.8 | 0.8 | 0.8 | 0.8 | 0.8 | 0.8 | 0.8 | 0.8 | 0.8 | 0.8 | 0.8 | 0.8 | 0.5 | 0.7 |     |
| SP      | 0.065 |               |       | $W^*$   | NaN | 87  | 67  | 68  | 82  | 58  | 55  | 63  | 63  | 64  | 64  | 64  | 64  | 64  | 64  | 64  | 64  |
|         |       |               |       | $L^*$   | NaN | 124 | 134 | 113 | 82  | 116 | 109 | 90  | 90  | 80  | 80  | 80  | 80  | 80  | 80  | 80  | 80  |
|         |       | $H^*$         | NaN   | 10      | 12  | 14  | 16  | 16  | 18  | 19  | 19  | 21  | 21  | 21  | 21  | 21  | 21  | 21  | 21  |     |     |
|         |       | $R^*$         | NaN   | 15      | 13  | 14  | 15  | 13  | 15  | 16  | 15  | 17  | 16  | 16  | 15  | 15  | 15  | 15  | 15  |     |     |
|         |       | $P_A^*$       | NaN   | 0.1     | 0.1 | 0.1 | 0.1 | 0.1 | 0.1 | 0.1 | 0.1 | 0.1 | 0.1 | 0.1 | 0.1 | 0.1 | 0.1 | 0.1 | 0.1 |     |     |
|         |       | $P_B^*$       | NaN   | 0.1     | 0.1 | 0.1 | 0.1 | 0.1 | 0.1 | 0.1 | 0.1 | 0.1 | 0.1 | 0.1 | 0.2 | 0.1 | 0.1 | 0.1 | 0.1 |     |     |
|         |       | $P_C^*$       | NaN   | 0.8     | 0.8 | 0.8 | 0.8 | 0.8 | 0.8 | 0.8 | 0.8 | 0.8 | 0.8 | 0.8 | 0.7 | 0.8 | 0.8 | 0.8 | 0.8 |     |     |
|         |       | $W^*$         | NaN   | NaN     | 98  | 85  | 79  | 104 | 101 | 98  | 62  | 93  | 93  | 93  | 93  | 93  | 93  | 93  | 93  |     |     |
|         |       | $L^*$         | NaN   | NaN     | 196 | 170 | 158 | 104 | 101 | 98  | 155 | 93  | 93  | 93  | 93  | 93  | 93  | 93  | 93  |     |     |
|         |       | $H^*$         | NaN   | NaN     | 9   | 12  | 14  | 16  | 17  | 18  | 18  | 20  | 20  | 20  | 20  | 20  | 20  | 20  | 20  |     |     |
|         |       | $R^*$         | NaN   | NaN     | 16  | 14  | 16  | 16  | 16  | 16  | 15  | 18  | 17  | 16  | 16  | 16  | 16  | 16  | 16  |     |     |
|         |       | Shared        | 0.222 | $P_A^*$ | NaN | NaN | 0.1 | 0.1 | 0.1 | 0.1 | 0.1 | 0.1 | 0.1 | 0.1 | 0.1 | 0.1 | 0.1 | 0.1 | 0.1 | 0.1 |     |
| $P_B^*$ | NaN   |               |       | NaN     | 0.1 | 0.1 | 0.1 | 0.1 | 0.1 | 0.1 | 0.1 | 0.1 | 0.1 | 0.1 | 0.1 | 0.1 | 0.1 | 0.1 |     |     |     |
| $P_C^*$ | NaN   |               |       | NaN     | 0.8 | 0.8 | 0.8 | 0.8 | 0.8 | 0.8 | 0.8 | 0.8 | 0.8 | 0.8 | 0.8 | 0.8 | 0.8 | 0.8 |     |     |     |
| $W^*$   | NaN   |               |       | NaN     | NaN | 118 | 116 | 88  | 80  | 110 | 107 | 72  | 89  | 89  | 89  | 89  | 89  | 89  |     |     |     |
| $L^*$   | NaN   |               |       | NaN     | NaN | 168 | 145 | 176 | 160 | 110 | 107 | 144 | 111 | 111 | 111 | 111 | 111 | 111 |     |     |     |
| $H^*$   | NaN   |               |       | NaN     | NaN | 11  | 13  | 14  | 17  | 18  | 19  | 21  | 22  | 22  | 22  | 22  | 22  |     |     |     |     |
| $R^*$   | NaN   |               |       | NaN     | NaN | 17  | 16  | 15  | 18  | 18  | 18  | 20  | 20  | 19  | 18  | 18  | 18  |     |     |     |     |
| $P_A^*$ | NaN   |               |       | NaN     | NaN | 0.1 | 0.1 | 0.1 | 0.1 | 0.1 | 0.1 | 0.1 | 0.1 | 0.1 | 0.1 | 0.1 | 0.1 |     |     |     |     |
| $P_B^*$ | NaN   |               |       | NaN     | NaN | 0.1 | 0.1 | 0.1 | 0.1 | 0.1 | 0.1 | 0.1 | 0.1 | 0.1 | 0.1 | 0.1 |     |     |     |     |     |
| $P_C^*$ | NaN   |               |       | NaN     | NaN | 0.8 | 0.8 | 0.8 | 0.8 | 0.8 | 0.8 | 0.8 | 0.8 | 0.8 | 0.8 | 0.8 |     |     |     |     |     |
| Shared  | 0.576 |               |       | $W^*$   | NaN | NaN | NaN | 118 | 116 | 88  | 80  | 110 | 107 | 72  | 89  | 89  | 89  | 89  | 89  |     |     |
|         |       |               |       | $L^*$   | NaN | NaN | NaN | 168 | 145 | 176 | 160 | 110 | 107 | 144 | 111 | 111 | 111 | 111 |     |     |     |
|         |       | $H^*$         | NaN   | NaN     | NaN | 11  | 13  | 14  | 17  | 18  | 19  | 21  | 22  | 22  | 22  |     |     |     |     |     |     |
|         |       | $R^*$         | NaN   | NaN     | NaN | 17  | 16  | 15  | 18  | 18  | 18  | 20  | 20  | 19  | 18  |     |     |     |     |     |     |
|         |       | $P_A^*$       | NaN   | NaN     | NaN | 0.1 | 0.1 | 0.1 | 0.1 | 0.1 | 0.1 | 0.1 | 0.1 | 0.1 | 0.1 |     |     |     |     |     |     |
|         |       | $P_B^*$       | NaN   | NaN     | NaN | 0.1 | 0.1 | 0.1 | 0.1 | 0.1 | 0.1 | 0.1 | 0.1 | 0.1 | 0.1 |     |     |     |     |     |     |
|         |       | $P_C^*$       | NaN   | NaN     | NaN | 0.8 | 0.8 | 0.8 | 0.8 | 0.8 | 0.8 | 0.8 | 0.8 | 0.8 | 0.8 |     |     |     |     |     |     |

**References**

Cai X, Heragu SS, Liu Y, 2014 *Modeling and evaluating the avs/rs with tier-to-tier vehicles using a semi-open queueing network. IIE Transactions* 46(9):905–927.

Lamballais T, Roy D, De Koster R, 2017 *Estimating performance in a robotic mobile fulfillment system. European Journal of Operational Research* 256(3):976–990.

Neuts MF, 1980 *The probabilistic significance of the rate matrix in matrix-geometric invariant vectors. Journal of Applied Probability* 17(01):291–296.

Tappia E, Roy D, De Koster R, Melacini M, 2017 *Modeling, analysis, and design insights for shuttle-based compact storage systems. Transportation Science* 51(1):269–295.
